# Supplementary material
Source: PubMed Central journal article supplement (PMC2635770)
Supplement: 0809667106_0809667106SI.pdf [file 0809667106_0809667106SI.pdf]

# Supporting Information

Bekinschtein et al. 10.1073/pnas.0809667106

## SI Text

**Local Field Potentials Recording and Processing.** Two patients suffering from drug-refractory epilepsy were stereotactically implanted as part of a presurgical evaluation with depth electrodes (Ad-Tech Medical Instruments). Electrodes were 2.3 mm long with 1-mm diameter cylinders and an interelectrodes distance of 10 mm. The local field potential was digitized at 400 Hz from intracerebral electrodes referenced to the vertex (Nicolet). Epochs were then extracted (−200 ms plus 1,300 ms from first sound onset). Electrodes with a rejection rate >35% in relation to ample slow wave of epileptic figures were discarded. Remaining electrodes were submitted to automatic artifact rejection (+300  $\mu$ V threshold), visually inspected, low-pass-filtered (70 Hz), and notch-filtered (50 Hz) by using EEGLAB software (39). Baseline correction before fifth sound onset was applied and potentials were then averaged.

Experimental conditions were compared by using sample-by-sample *t* tests, with a first criterion of  $P < 0.05$  for a minimum of 10 consecutive samples. Once an effect satisfied this first criterion, we counted the observed number of consecutive samples ( $\geq 10$ ) satisfying this criterion, and we also checked if the observed effect resisted to more conservative thresholds (10 consecutive samples at  $P < 0.01$ , 0.005, 0.001, 0.0005, and 0.0001). We kept the more conservative observed criteria (e.g., 10 samples at  $P < 0.001$  or 35 samples at  $P < 0.05$ ), and further checked the statistical significance of this observed effect through Monte Carlo permutations following we described elsewhere (40, 41). This procedure is particularly relevant to estimate the statistical significance of effects observed

with a signal of unknown distribution (42). For each patient and for each electrode showing a significant effect, we computed 1,000 random permutations of the observed trials in 2 surrogate conditions; for each permutation, we then counted the number of surrogate effects satisfying our criterion. We then computed the observed probability of this criterion (number of surrogate effects per 1,000) and used this proportion as an estimate of the first-order  $\alpha$  risk. For each patient and each electrode, this *P* value was  $<0.05$ .

**fMRI.** We used a 3-Tesla body system (Siemens) and a gradient echoplanar-imaging sequence sensitive to brain oxygen-level-dependent (BOLD) signal (44 contiguous axial slices, 3 mm thickness; TR = 2400 ms; angle = 90°, TE = 30 ms, in-plane resolution =  $3 \times 3 \times 3$  mm<sup>3</sup>, matrix =  $64 \times 64 \times 44$ ). In each run, 100 functional volumes were acquired. The first 2 volumes were discarded to reach equilibrium. T1-weighted images were also acquired for anatomical localization. Data processing, performed with SPM5 software, included corrections for EPI distortion, slice acquisition time, and motion; normalization; Gaussian smoothing (5-mm FWHM); fitting with a linear combination of functions derived by convolving a standard hemodynamic response with the time series of the 4 stimulus types, time-locked with the onset of the fifth sound of stimuli (local standard/deviant  $\times$  global standard/deviant). We then ran a second-level random-effect group analysis, with a voxelwise threshold  $P < 0.01$  and cluster size threshold of  $P < 0.05$  corrected for multiple comparisons across the whole brain. We contrasted local deviant minus local standard trials, and global deviant minus global standard trials (see Table S1).

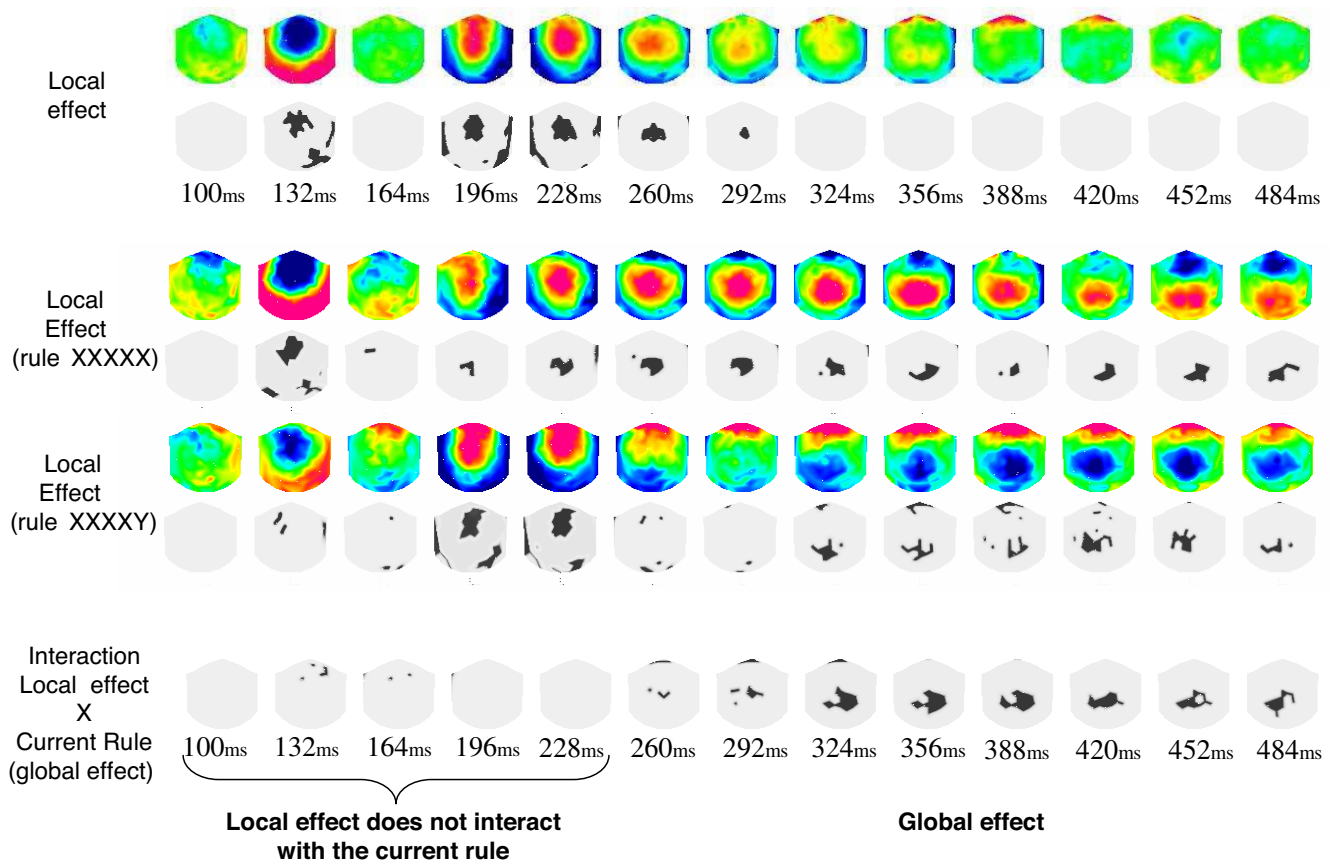

**Fig. S1.** Local effect split by current global regularity in the counting group. Averaged voltage scalpmaps of the local effect subtractions are plotted separately for the two global rules (LDGD-LSGS and LDGS-LSGD) (top) from 100 to 484 ms after the onset of the fifth sound. Corresponding thresholded t-tests scalpmaps are shown for each condition (black and white maps). Bottom maps show the interaction between the local effect and the current global rule (current block type): it mathematically corresponds to the main effect of the global violation ( $[(LDGD - LSGS) - (LDGS - LSGD)] = [(LDGD + LSGD) - (LSGS + LDGS)]$ ), and shows that the temporal window of the local effect is not affected by the current global rule.



**Table S1. Summary of fMRI peak of activations for the local and global effects**

| Effect        | Structure          | MNI Coordinates | T value |
|---------------|--------------------|-----------------|---------|
| Local effect  | Right STG          | 54 -18 3        | 5.26    |
| Local effect  | Left STG           | 33 -15 5        | 4.83    |
| Global effect | Right DLPC         | 54 9 -9         | 7.69    |
| Global effect | Left DLPFC         | -51 9 6         | 5.95    |
| Global effect | Anterior Cingulate | -9 18 39        | 6.26    |
| Global effect | Left STG           | -54 -27 0       | 6.64    |
| Global effect | Right STG          | 57 -18 3        | 5.49    |
| Global effect | Left Parietal      | -12 -66 54      | 4.61    |
| Global effect | Occipital pole     | -6 -102 3       | 6.77    |

DLPC, dorso-lateral prefrontal cortex; STG , superior temporal gyrus. For illustration we show here the coordinates of the highest activation peaks (voxelwise  $P < 0.001$ , clusterwise  $> 30$  voxels).

**Table S2. Synthetic description of DOC patients**

| Patient | Age | Sexe | Aetiology                   | Delay (days or months) | Glasgow (E/M/V) | CRS-R (total and subscale scores)* |
|---------|-----|------|-----------------------------|------------------------|-----------------|------------------------------------|
| MCS 1   | 36  | Male | Stroke <sup>†</sup>         | 24 d                   | 6 (4/1/1)       | 6 (1 1 0 1 1 2)                    |
| MCS 2   | 28  | Male | TBI                         | 17 d                   | 5 (3/1/1)       | 6 (1 3 0 1 0 1)                    |
| MCS 3   | 23  | Male | Encephalopathy <sup>‡</sup> | 6 m                    | 10 (4/5/1)      | 17 ( <b>4</b> 5 2 2 1 2)           |
| MCS 4   | 33  | Male | TBI                         | 22 d                   | 9 (3/5/1)       | 10 (2 <b>2 4</b> 1 0 1)            |
| VS 1    | 67  | Male | Anoxia                      | 2 m                    | 7 (4/2/1)       | 7 (2 1 1 1 0 2)                    |
| VS2     | 62  | Male | Encephalopathy <sup>§</sup> | 2 m                    | 4 (2/1/1)       | 1 (0 0 0 0 0 1)                    |
| VS3     | 31  | Male | Anoxia                      | 8 d                    | 4 (2/1/1)       | 4 (0 0 1 1 0 2)                    |
| VS4     | 61  | Male | TBI                         | 30 d                   | 4 (2/1/1)       | 3 (1 0 0 1 0 1)                    |

The french adaptation (established by Laureys in 2004) of the revised Coma Recovery Scale (36) (CRS-R) was used. TBI, traumatic brain injury.

\*For MCS patients, subscale-scores of the CRS-R indicating an MCS status are bolded.

<sup>†</sup>In addition to his MCS condition, this patient had a typical locked-in syndrome with quadriplegia and aphonia secondary to a ventral pontic stroke. Eye-opening and vertical eye-movements were the only possible voluntary movements. Several weeks later, when this patient recovered a full conscious state, he was still affected by these severe motor deficits.

<sup>‡</sup>This patient had a congenital deficiency in Pyruvate Deshydrogenase enzyme

<sup>§</sup>This patient had a MELAS mitochondrial genetic deficiency (Myopathy Encephalopathy Lactate Acidose Stroke)

## Other Supporting Information Files

[SI Appendix](#)
